# Supplementary material for: Dietary Intake by Food Source and Eating Location in Low- and Middle-Income Chilean Preschool Children and Adolescents from Southeast Santiago
Source: Nutrients. 2019 Jul 23;11(7):1695. doi: 10.3390/nu11071695 (PMC6683044; doi:10.3390/nu11071695)
Supplement: Supplementary file 1 [file nutrients-11-01695-s001.pdf]

## Supplementary Material

Table S1. Food and beverage groups used for classification

| Food group name                                | Type of group | Food group description                                                                                                                                                                                                                                                                                                                                                       |
|------------------------------------------------|---------------|------------------------------------------------------------------------------------------------------------------------------------------------------------------------------------------------------------------------------------------------------------------------------------------------------------------------------------------------------------------------------|
| Cereal-based foods                             | Basic         | Includes grains and grain-based flours and starches, dry pasta and noodles, dough, packaged or fresh breads and bread crumbs but excludes crackers.                                                                                                                                                                                                                          |
| Breakfast cereals                              | Nonbasic      | Includes ready-to-eat and not ready-to-eat breakfast cereals with rice, oats, corn, quinoa, and/or wheat as primary ingredients.                                                                                                                                                                                                                                             |
| Grain-based desserts                           | Nonbasic      | Includes sweet bakery products and sweet cookies, cereal and protein bars; with or without added fruits, nuts, or chocolate; made with grain as a primary or major ingredient.                                                                                                                                                                                               |
| Sweets and non-grain-based desserts            | Nonbasic      | Includes sweet products, sweet spreads, and sweet dairy-based desserts, with or without added fruit or added sugar, in any edible form, frozen or not, with no or minimal grain content.                                                                                                                                                                                     |
| Caloric sweeteners                             | Nonbasic      | Includes caloric sweeteners, varying solutions of glucose or fructose.                                                                                                                                                                                                                                                                                                       |
| Noncaloric sweeteners                          | Nonbasic      | Includes noncaloric sweeteners, artificial or natural.                                                                                                                                                                                                                                                                                                                       |
| Salty snacks                                   | Nonbasic      | Includes crackers and salty snacks made from any grain, starchy vegetable, or tuber and includes nuts, seeds, and nut and seed butters.                                                                                                                                                                                                                                      |
| Meat, poultry, and meat substitutes            | Basic         | Includes processed or unprocessed meat, poultry, and meat substitutes, with or without added ingredients.                                                                                                                                                                                                                                                                    |
| Fish and seafood                               | Basic         | Includes processed or unprocessed fish, seafood, and seaweed products.                                                                                                                                                                                                                                                                                                       |
| Dairy products and dairy substitutes           | Basic         | Includes dairy-based food products and dairy substitutes and includes cheese, yogurt, cream, evaporated and condensed milk, soy-based yogurt, and soy-based cheese.                                                                                                                                                                                                          |
| Eggs                                           | Basic         | Includes chicken, turkey, quail, and other animal eggs and egg substitutes; fresh, raw, or processed; and includes cooked eggs, with or without added ingredients.                                                                                                                                                                                                           |
| Legumes                                        | Basic         | Includes fresh or processed legumes, beans, lentils, and peas, with or without added ingredients, and includes soy beans but not soy-based products.                                                                                                                                                                                                                         |
| Fruits, vegetables, and mushrooms              | Basic         | Includes processed and unprocessed fruits, vegetables, and mushrooms, with or without added ingredients.                                                                                                                                                                                                                                                                     |
| Condiments and sauces                          | Nonbasic      | Includes sauces or other preparations used to enhance or add flavor to foods.                                                                                                                                                                                                                                                                                                |
| Salt and seasonings                            | Nonbasic      | Includes salt, salt substitutes, spices, spice mixes, and seasonings.                                                                                                                                                                                                                                                                                                        |
| Soups                                          | Nonbasic      | Includes dry, instant, canned, and prepared soups and includes bouillon, stock, and broth.                                                                                                                                                                                                                                                                                   |
| Oils and fats                                  | Basic         | Includes oils and fats derived from plants, seeds, or animal sources and includes butter, lard, and margarine.                                                                                                                                                                                                                                                               |
| Mixed dishes                                   | Basic         | Includes dishes and other food items containing mixtures or combinations of vegetables, legumes, meats, poultry, fish, seafood, dough, bread, grains, and seasonings prepared or cooked in any form; may be packaged or unpackaged, may be ready to eat, or may require preparation.                                                                                         |
| Empanadas and sandwiches                       | Nonbasic      | Bread or pastry items with savory fillings or toppings; may be packaged or unpackaged, may be ready to eat, or may require preparation.                                                                                                                                                                                                                                      |
| Fast foods                                     | Nonbasic      | Includes fast food items purchased as single items or as meal combinations, such as burgers, pizzas, chicken, fries, combo meal packages, and desserts.                                                                                                                                                                                                                      |
| Baby foods                                     | Basic         | Includes baby food products, pureed, with cereals, fruits, vegetables, or meats, and includes <i>picados</i> and <i>colados</i> .                                                                                                                                                                                                                                            |
| Beverage group name                            | Type of group | Beverage group description                                                                                                                                                                                                                                                                                                                                                   |
| Sugar-sweetened beverages (SSBs)               | Nonbasic      | Includes industrialized flavored waters, sport drinks, energy drinks, sodas, and fruit and vegetable juices, milk, dairy drinks, drinkable yogurt, fermented milk, soy-based beverages, other dairy substitutes, and milk modifiers with sugar.                                                                                                                              |
| Water                                          | Basic         | Includes plain water and industrialized flavored waters without sugar.                                                                                                                                                                                                                                                                                                       |
| Diet sport and energy drinks                   | Nonbasic      | Includes sport drinks and energy drinks without sugar.                                                                                                                                                                                                                                                                                                                       |
| Sodas without added sugar                      | Nonbasic      | Includes sodas without sugar.                                                                                                                                                                                                                                                                                                                                                |
| Diet industrialized fruit and vegetable juices | Nonbasic      | Includes industrialized fruit and vegetable juices without sugar.                                                                                                                                                                                                                                                                                                            |
| Unsweetened dairy drinks and dairy substitutes | Basic         | Includes milk, dairy drinks, drinkable yogurt, fermented milk, soy-based beverages, other dairy substitutes, and milk modifiers that are plain or flavored without sugar.                                                                                                                                                                                                    |
| 100% fruit and vegetable juices                | Nonbasic      | Includes fruit and vegetable juices with no added ingredients.                                                                                                                                                                                                                                                                                                               |
| Coffee and tea                                 | Nonbasic      | Includes instant, powder or granule, roasted, or ground coffee beverages; drinks containing coffee with other ingredients, such as milk or sugar; and coffee substitutes of plant origin, such as soy, chicory, or barley; and includes regular and herbal teas made from plant parts in all forms; such as leaves, powder, or prepared tea bags; to brew or ready to drink. |
| Special formulas and nutritional supplements   | Basic         | Includes infant, toddler, maternal, and elderly special milks and nutritional supplements intended to meet nutritional requirements for an age or stage of life.                                                                                                                                                                                                             |

Table S2. Per capita and per consumer intake of calories and key nutrients of concern by food source\* among low- and middle-income Chilean preschool children and adolescents, 2016

| Preschool children (n = 839)    |                         |            |      |               |      | Adolescents (n = 643)           |                         |            |      |               |      |
|---------------------------------|-------------------------|------------|------|---------------|------|---------------------------------|-------------------------|------------|------|---------------|------|
| Food source                     | % of total daily intake | Per capita |      | Per consumers |      | Food source                     | % of total daily intake | Per capita |      | Per consumers |      |
|                                 |                         | Mean       | SE†  | Mean          | SE   |                                 |                         | Mean       | SE   | Mean          | SE   |
| <b>Home (n = 839)</b>           |                         |            |      |               |      | <b>Home (n = 641)</b>           |                         |            |      |               |      |
| Energy, kcal/day                | 82.9%                   | 1,041.6    | 14.2 | 1,041.6       | 14.2 | Energy, kcal/day                | 77.6%                   | 1,416.5    | 25.5 | 1,420.9       | 25.4 |
| Saturated fats, g/day           | 82.9%                   | 11.5       | 0.2  | 11.5          | 0.2  | Saturated fats, g/day           | 77.2%                   | 15.4       | 0.4  | 15.5          | 0.4  |
| Total sugars, g/day             | 86.8%                   | 77.3       | 1.3  | 77.3          | 1.3  | Total sugars, g/day             | 78.3%                   | 78.3       | 2.0  | 78.5          | 2.0  |
| Sodium, mg/day                  | 86.2%                   | 1,284.9    | 24.0 | 1,284.9       | 24.0 | Sodium, mg/day                  | 80.7%                   | 1,887.2    | 40.5 | 1,893.1       | 40.4 |
| <b>Away from home (n = 497)</b> |                         |            |      |               |      | <b>Away from home (n = 468)</b> |                         |            |      |               |      |
| Energy, kcal/day                | 17.1%                   | 215.6      | 10.1 | 364.0         | 13.4 | Energy, kcal/day                | 22.4%                   | 409.8      | 17.4 | 563.0         | 19.7 |
| Saturated fats, g/day           | 17.0%                   | 2.4        | 0.1  | 4.0           | 0.2  | Saturated fats, g/day           | 22.8%                   | 4.6        | 0.2  | 6.3           | 0.3  |
| Total sugars, g/day             | 13.2%                   | 11.7       | 0.6  | 19.8          | 0.9  | Total sugars, g/day             | 21.7%                   | 21.7       | 1.2  | 29.8          | 1.4  |
| Sodium, mg/day                  | 13.8%                   | 206.2      | 10.6 | 348.1         | 14.9 | Sodium, mg/day                  | 19.3%                   | 451.8      | 24.4 | 620.7         | 29.9 |

\*We determined the food source by combining foods purchased at groceries, convenience stores, or supermarkets and products made at home into one category (home) and combining ready-to-eat food obtained at school and other sources, such as restaurants and fast food establishments, into another category (away from home).

† SE, Standard error.

Table S3. Per capita and per consumer intake of calories and key nutrients of concern by eating location\* among low- and middle-income Chilean preschool children and adolescents, 2016

| Preschool children (n = 839) |                         |            |      |               |      | Adolescents (n = 643)   |                         |            |      |               |      |
|------------------------------|-------------------------|------------|------|---------------|------|-------------------------|-------------------------|------------|------|---------------|------|
| Eating location              | % of total daily intake | Per capita |      | Per consumers |      | Eating location         | % of total daily intake | Per capita |      | Per consumers |      |
|                              |                         | Mean       | SE†  | Mean          | SE   |                         |                         | Mean       | SE   | Mean          | SE   |
| <b>Home (n = 831)</b>        |                         |            |      |               |      | <b>Home (n = 632)</b>   |                         |            |      |               |      |
| Energy, kcal/day             | 66.3%                   | 834.0      | 13.9 | 842.0         | 13.8 | Energy, kcal/day        | 62.8%                   | 1,146.9    | 24.5 | 1,166.9       | 24.1 |
| Saturated fats, g/day        | 68.8%                   | 9.6        | 0.2  | 9.7           | 0.2  | Saturated fats, g/day   | 59.6%                   | 11.9       | 0.4  | 12.1          | 0.4  |
| Total sugars, g/day          | 62.3%                   | 55.4       | 1.1  | 56.0          | 1.1  | Total sugars, g/day     | 58.5%                   | 58.5       | 1.8  | 59.5          | 1.8  |
| Sodium, mg/day               | 73.6%                   | 1,097.2    | 23.3 | 1,107.7       | 23.2 | Sodium, mg/day          | 69.0%                   | 1,613.5    | 40.4 | 1,641.6       | 40.2 |
| <b>School (n = 616)</b>      |                         |            |      |               |      | <b>School (n = 496)</b> |                         |            |      |               |      |
| Energy, kcal/day             | 22.3%                   | 280.5      | 9.9  | 382.1         | 10.8 | Energy, kcal/day        | 26.6%                   | 486.7      | 16.7 | 630.9         | 16.8 |
| Saturated fats, g/day        | 19.2%                   | 2.7        | 0.1  | 3.6           | 0.1  | Saturated fats, g/day   | 28.9%                   | 5.8        | 0.2  | 7.5           | 0.2  |
| Total sugars, g/day          | 25.6%                   | 22.8       | 0.7  | 31.0          | 0.8  | Total sugars, g/day     | 30.1%                   | 30.1       | 1.2  | 39.0          | 1.3  |
| Sodium, mg/day               | 15.5%                   | 230.9      | 9.6  | 314.5         | 11.3 | Sodium, mg/day          | 20.5%                   | 480.4      | 20.3 | 622.8         | 22.6 |
| <b>Other (n = 384)</b>       |                         |            |      |               |      | <b>Other (n = 229)</b>  |                         |            |      |               |      |
| Energy, kcal/day             | 11.3%                   | 142.7      | 9.8  | 311.8         | 18.0 | Energy, kcal/day        | 10.6%                   | 192.7      | 16.5 | 541.0         | 36.3 |
| Saturated fats, g/day        | 12.0%                   | 1.7        | 0.1  | 3.6           | 0.2  | Saturated fats, g/day   | 11.5%                   | 2.3        | 0.2  | 6.5           | 0.5  |
| Total sugars, g/day          | 12.1%                   | 10.8       | 0.8  | 23.6          | 1.4  | Total sugars, g/day     | 11.4%                   | 11.4       | 1.0  | 32.1          | 2.3  |
| Sodium, mg/day               | 10.9%                   | 163.1      | 13.7 | 356.3         | 26.7 | Sodium, mg/day          | 10.5%                   | 245.0      | 24.2 | 687.9         | 57.2 |

\*We designated the eating location as home if food was consumed at home, school if food was consumed at school, and other if food was consumed at another person's home, at a food court, at a cinema, at a restaurant, in the street, on transportation, or at another location.

† SE, Standard error.

Table S4. Per capita and per consumer intake of calories and key nutrients of concern by food source\* among low- and middle-income Chilean preschool children and adolescents, 2016, excluding outliers for saturated fats and sodium

| Preschool children (n = 831)    |                         |            |      |               |      | Adolescents (n = 637)           |                         |            |      |               |      |
|---------------------------------|-------------------------|------------|------|---------------|------|---------------------------------|-------------------------|------------|------|---------------|------|
| Food source                     | % of total daily intake | Per capita |      | Per consumers |      | Food source                     | % of total daily intake | Per capita |      | Per consumers |      |
|                                 |                         | Mean       | SE†  | Mean          | SE   |                                 |                         | Mean       | SE   | Mean          | SE   |
| <b>Home (n = 831)</b>           |                         |            |      |               |      | <b>Home (n = 635)</b>           |                         |            |      |               |      |
| Energy, kcal/day                | 82.8%                   | 1,034.7    | 13.8 | 1,034.7       | 13.8 | Energy, kcal/day                | 77.6%                   | 1,408.4    | 25.5 | 1,412.8       | 25.4 |
| Saturated fats, g/day           | 83.1%                   | 11.4       | 0.2  | 11.4          | 0.2  | Saturated fats, g/day           | 77.0%                   | 15.2       | 0.4  | 15.2          | 0.4  |
| Total sugars, g/day             | 86.9%                   | 76.8       | 1.2  | 76.8          | 1.2  | Total sugars, g/day             | 78.4%                   | 78.0       | 2.0  | 78.3          | 2.0  |
| Sodium, mg/day                  | 86.1%                   | 1,267.8    | 22.6 | 1,267.8       | 22.6 | Sodium, mg/day                  | 80.6%                   | 1,859.8    | 38.6 | 1,865.6       | 38.5 |
| <b>Away from home (n = 492)</b> |                         |            |      |               |      | <b>Away from home (n = 464)</b> |                         |            |      |               |      |
| Energy, kcal/day                | 17.2%                   | 214.5      | 10.0 | 362.3         | 13.3 | Energy, kcal/day                | 22.4%                   | 407.4      | 17.3 | 559.3         | 19.5 |
| Saturated fats, g/day           | 16.9%                   | 2.3        | 0.1  | 3.9           | 0.2  | Saturated fats, g/day           | 23.0%                   | 4.5        | 0.2  | 6.2           | 0.3  |
| Total sugars, g/day             | 13.1%                   | 11.6       | 0.6  | 19.6          | 0.9  | Total sugars, g/day             | 21.6%                   | 21.5       | 1.2  | 29.5          | 1.4  |
| Sodium, mg/day                  | 13.9%                   | 205.5      | 10.6 | 347.1         | 14.8 | Sodium, mg/day                  | 19.4%                   | 447.0      | 24.2 | 613.7         | 29.7 |

\*We determined the food source by combining foods purchased at groceries, convenience stores, or supermarkets and products made at home into one category (home) and combining ready-to-eat food obtained at school and other sources, such as restaurants and fast food establishments, into another category (away from home).

† SE, Standard error.

Table S5. Per capita and per consumer intake of calories and key nutrients of concern by eating location\* among low- and middle-income Chilean preschool children and adolescents, 2016, excluding outliers for saturated fats and sodium

| Preschool children (n = 831) |                         |            |      |               |      | Adolescents (n = 637)   |                         |            |      |               |      |
|------------------------------|-------------------------|------------|------|---------------|------|-------------------------|-------------------------|------------|------|---------------|------|
| Eating location              | % of total daily intake | Per capita |      | Per consumers |      | Eating location         | % of total daily intake | Per capita |      | Per consumers |      |
|                              |                         | Mean       | SE†  | Mean          | SE   |                         |                         | Mean       | SE   | Mean          | SE   |
| <b>Home (n = 823)</b>        |                         |            |      |               |      | <b>Home (n = 626)</b>   |                         |            |      |               |      |
| Energy, kcal/day             | 66.2%                   | 826.4      | 13.6 | 834.4         | 13.4 | Energy, kcal/day        | 62.8%                   | 1,139.8    | 24.4 | 1,159.8       | 24.1 |
| Saturated fats, g/day        | 68.5%                   | 9.4        | 0.2  | 9.5           | 0.2  | Saturated fats, g/day   | 59.2%                   | 11.7       | 0.3  | 11.9          | 0.3  |
| Total sugars, g/day          | 62.0%                   | 54.9       | 1.1  | 55.4          | 1.1  | Total sugars, g/day     | 58.5%                   | 58.2       | 1.7  | 59.2          | 1.8  |
| Sodium, mg/day               | 73.5%                   | 1,083.2    | 22.2 | 1,093.7       | 22.1 | Sodium, mg/day          | 68.9%                   | 1,589.6    | 38.5 | 1,617.6       | 38.2 |
| <b>School (n = 611)</b>      |                         |            |      |               |      | <b>School (n = 493)</b> |                         |            |      |               |      |
| Energy, kcal/day             | 22.5%                   | 281.2      | 9.9  | 382.5         | 10.9 | Energy, kcal/day        | 26.9%                   | 488.2      | 16.7 | 630.8         | 16.9 |
| Saturated fats, g/day        | 19.5%                   | 2.7        | 0.1  | 3.7           | 0.1  | Saturated fats, g/day   | 29.5%                   | 5.8        | 0.2  | 7.5           | 0.2  |
| Total sugars, g/day          | 25.8%                   | 22.8       | 0.7  | 31.0          | 0.8  | Total sugars, g/day     | 30.3%                   | 30.2       | 1.2  | 39.0          | 1.3  |
| Sodium, mg/day               | 15.7%                   | 231.8      | 9.6  | 315.2         | 11.3 | Sodium, mg/day          | 20.8%                   | 479.7      | 20.3 | 619.8         | 22.6 |
| <b>Other (n = 376)</b>       |                         |            |      |               |      | <b>Other (n = 224)</b>  |                         |            |      |               |      |
| Energy, kcal/day             | 11.3%                   | 141.5      | 9.9  | 312.8         | 18.3 | Energy, kcal/day        | 10.3%                   | 187.8      | 16.2 | 534.1         | 36.1 |
| Saturated fats, g/day        | 11.9%                   | 1.6        | 0.1  | 3.6           | 0.2  | Saturated fats, g/day   | 11.4%                   | 2.2        | 0.2  | 6.4           | 0.5  |
| Total sugars, g/day          | 12.2%                   | 10.8       | 0.8  | 23.8          | 1.4  | Total sugars, g/day     | 11.2%                   | 11.1       | 1.0  | 31.7          | 2.3  |
| Sodium, mg/day               | 10.7%                   | 158.4      | 13.0 | 350.0         | 25.4 | Sodium, mg/day          | 10.3%                   | 237.5      | 23.6 | 675.4         | 56.6 |

\*We designated the eating location as home if food was consumed at home, school if food was consumed at school, and other if food was consumed at another person's home, at a food court, at a cinema, at a restaurant, in the street, on transportation, or at another location.

† SE, Standard error.

Table S6. Per capita and per consumer intake of calories and key nutrients of concern by food source\* among low- and middle-income Chilean preschool children and adolescents during weekends, 2016.

| Preschool children (n = 172)   |                         |            |      |               |      | Adolescents (n = 168)          |                         |            |      |               |       |
|--------------------------------|-------------------------|------------|------|---------------|------|--------------------------------|-------------------------|------------|------|---------------|-------|
| Food source                    | % of total daily intake | Per capita |      | Per consumers |      | Food source                    | % of total daily intake | Per capita |      | Per consumers |       |
|                                |                         | Mean       | SE†  | Mean          | SE   |                                |                         | Mean       | SE   | Mean          | SE    |
| <b>Home (n = 172)</b>          |                         |            |      |               |      | <b>Home (n = 168)</b>          |                         |            |      |               |       |
| Energy, kcal/day               | 86.3%                   | 996.1      | 27.9 | 996.1         | 27.9 | Energy, kcal/day               | 84.3%                   | 1,625.6    | 49.9 | 1,625.6       | 49.9  |
| Saturated fats, g/day          | 84.8%                   | 11.2       | 0.5  | 11.2          | 0.5  | Saturated fats, g/day          | 82.5%                   | 17.9       | 0.7  | 17.9          | 0.7   |
| Total sugars, g/day            | 85.5%                   | 70.2       | 2.7  | 70.2          | 2.7  | Total sugars, g/day            | 82.7%                   | 84.6       | 3.9  | 84.6          | 3.9   |
| Sodium, mg/day                 | 85.4%                   | 1,296.5    | 47.5 | 1,296.5       | 47.5 | Sodium, mg/day                 | 85.7%                   | 2,278.0    | 85.7 | 2,278.0       | 85.7  |
| <b>Away from home (n = 87)</b> |                         |            |      |               |      | <b>Away from home (n = 81)</b> |                         |            |      |               |       |
| Energy, kcal/day               | 13.7%                   | 158.6      | 19.6 | 313.6         | 30.7 | Energy, kcal/day               | 15.7%                   | 302.2      | 44.0 | 626.9         | 76.5  |
| Saturated fats, g/day          | 15.2%                   | 2.0        | 0.3  | 4.0           | 0.5  | Saturated fats, g/day          | 17.5%                   | 3.8        | 0.6  | 7.8           | 1.1   |
| Total sugars, g/day            | 14.5%                   | 11.9       | 1.8  | 23.5          | 3.1  | Total sugars, g/day            | 17.3%                   | 17.7       | 3.1  | 36.7          | 5.8   |
| Sodium, mg/day                 | 14.6%                   | 221.6      | 33.9 | 438.2         | 58.5 | Sodium, mg/day                 | 14.3%                   | 380.5      | 59.5 | 789.3         | 106.2 |

\*We determined the food source by combining foods purchased at groceries, convenience stores, or supermarkets and products made at home into one category (home) and combining ready-to-eat food obtained at school and other sources, such as restaurants and fast food establishments, into another category (away from home).

† SE, Standard error.

Table S7. Per capita and per consumer intake of calories and key nutrients of concern by eating location\* among low- and middle-income Chilean preschool children and adolescents during weekends, 2016

| Preschool children (n = 172) |                         |            |               |         |         | Adolescents (n = 168) |                         |            |               |         |       |
|------------------------------|-------------------------|------------|---------------|---------|---------|-----------------------|-------------------------|------------|---------------|---------|-------|
| Eating location              | % of total daily intake | Per capita | Per consumers |         |         | Eating location       | % of total daily intake | Per capita | Per consumers |         |       |
|                              |                         | Mean       | SE†           | Mean    | SE      |                       |                         | Mean       | SE            | Mean    | SE    |
| <b>Home (n = 164)</b>        |                         |            |               |         |         | <b>Home (n = 164)</b> |                         |            |               |         |       |
| Energy, kcal/day             | 72.8%                   | 840.0      | 33.3          | 881.0   | 31.5    | Energy, kcal/day      | 71.2%                   | 1,372.6    | 56.1          | 1,406.1 | 54.9  |
| Saturated fats, g/day        | 72.4%                   | 9.6        | 0.5           | 10.0    | 0.5     | Saturated fats, g/day | 68.7%                   | 14.9       | 0.7           | 15.2    | 0.7   |
| Total sugars, g/day          | 73.3%                   | 60.2       | 2.9           | 63.1    | 2.8     | Total sugars, g/day   | 67.7%                   | 69.3       | 3.9           | 71.0    | 3.9   |
| Sodium, mg/day               | 71.6%                   | 1,086.7    | 50.4          | 1,139.7 | 49.3    | Sodium, mg/day        | 74.0%                   | 1,968.3    | 91.6          | 2,016.3 | 90.7  |
| <b>School (n = 2)</b>        |                         |            |               |         |         | <b>School (n = 7)</b> |                         |            |               |         |       |
| Energy, kcal/day             | 0.7%                    | 7.6        | 6.2           | 655.1   | 369.4   | Energy, kcal/day      | 0.6%                    | 11.5       | 5.8           | 277.0   | 101.3 |
| Saturated fats, g/day        | 0.6%                    | 0.1        | 0.1           | 7.0     | 5.5     | Saturated fats, g/day | 0.6%                    | 0.1        | 0.1           | 3.2     | 1.2   |
| Total sugars, g/day          | 0.7%                    | 0.6        | 0.5           | 50.4    | 28.6    | Total sugars, g/day   | 0.8%                    | 0.8        | 0.4           | 20.4    | 5.5   |
| Sodium, mg/day               | 1.5%                    | 22.1       | 19.0          | 1,902.9 | 1,320.7 | Sodium, mg/day        | 0.3%                    | 8.0        | 5.0           | 191.1   | 105.5 |
| <b>Other (n = 100)</b>       |                         |            |               |         |         | <b>Other (n = 90)</b> |                         |            |               |         |       |
| Energy, kcal/day             | 26.6%                   | 307.0      | 33.2          | 528.1   | 45.8    | Energy, kcal/day      | 28.2%                   | 543.7      | 61.4          | 1,015.0 | 88.5  |
| Saturated fats, g/day        | 27.0%                   | 3.6        | 0.5           | 6.2     | 0.7     | Saturated fats, g/day | 30.7%                   | 6.6        | 0.8           | 12.4    | 1.2   |
| Total sugars, g/day          | 26.0%                   | 21.3       | 2.4           | 36.7    | 3.4     | Total sugars, g/day   | 31.5%                   | 32.2       | 4.1           | 60.1    | 6.3   |
| Sodium, mg/day               | 27.0%                   | 409.3      | 48.0          | 704.0   | 69.0    | Sodium, mg/day        | 25.7%                   | 682.2      | 84.2          | 1,273.5 | 128.0 |

\*We designated the eating location as home if food was consumed at home, school if food was consumed at school, and other if food was consumed at another person's home, at a food court, at a cinema, at a restaurant, in the street, on transportation, or at another location.

† SE, Standard error.
